# Supplementary material for: Surgery, radiotherapy and endocrine therapy for oligometastatic prostate cancer efficacy: a systematic review and network meta-analysis
Source: PeerJ journal article supplement (doi:10.7717/peerj.19819), 2025-08-29

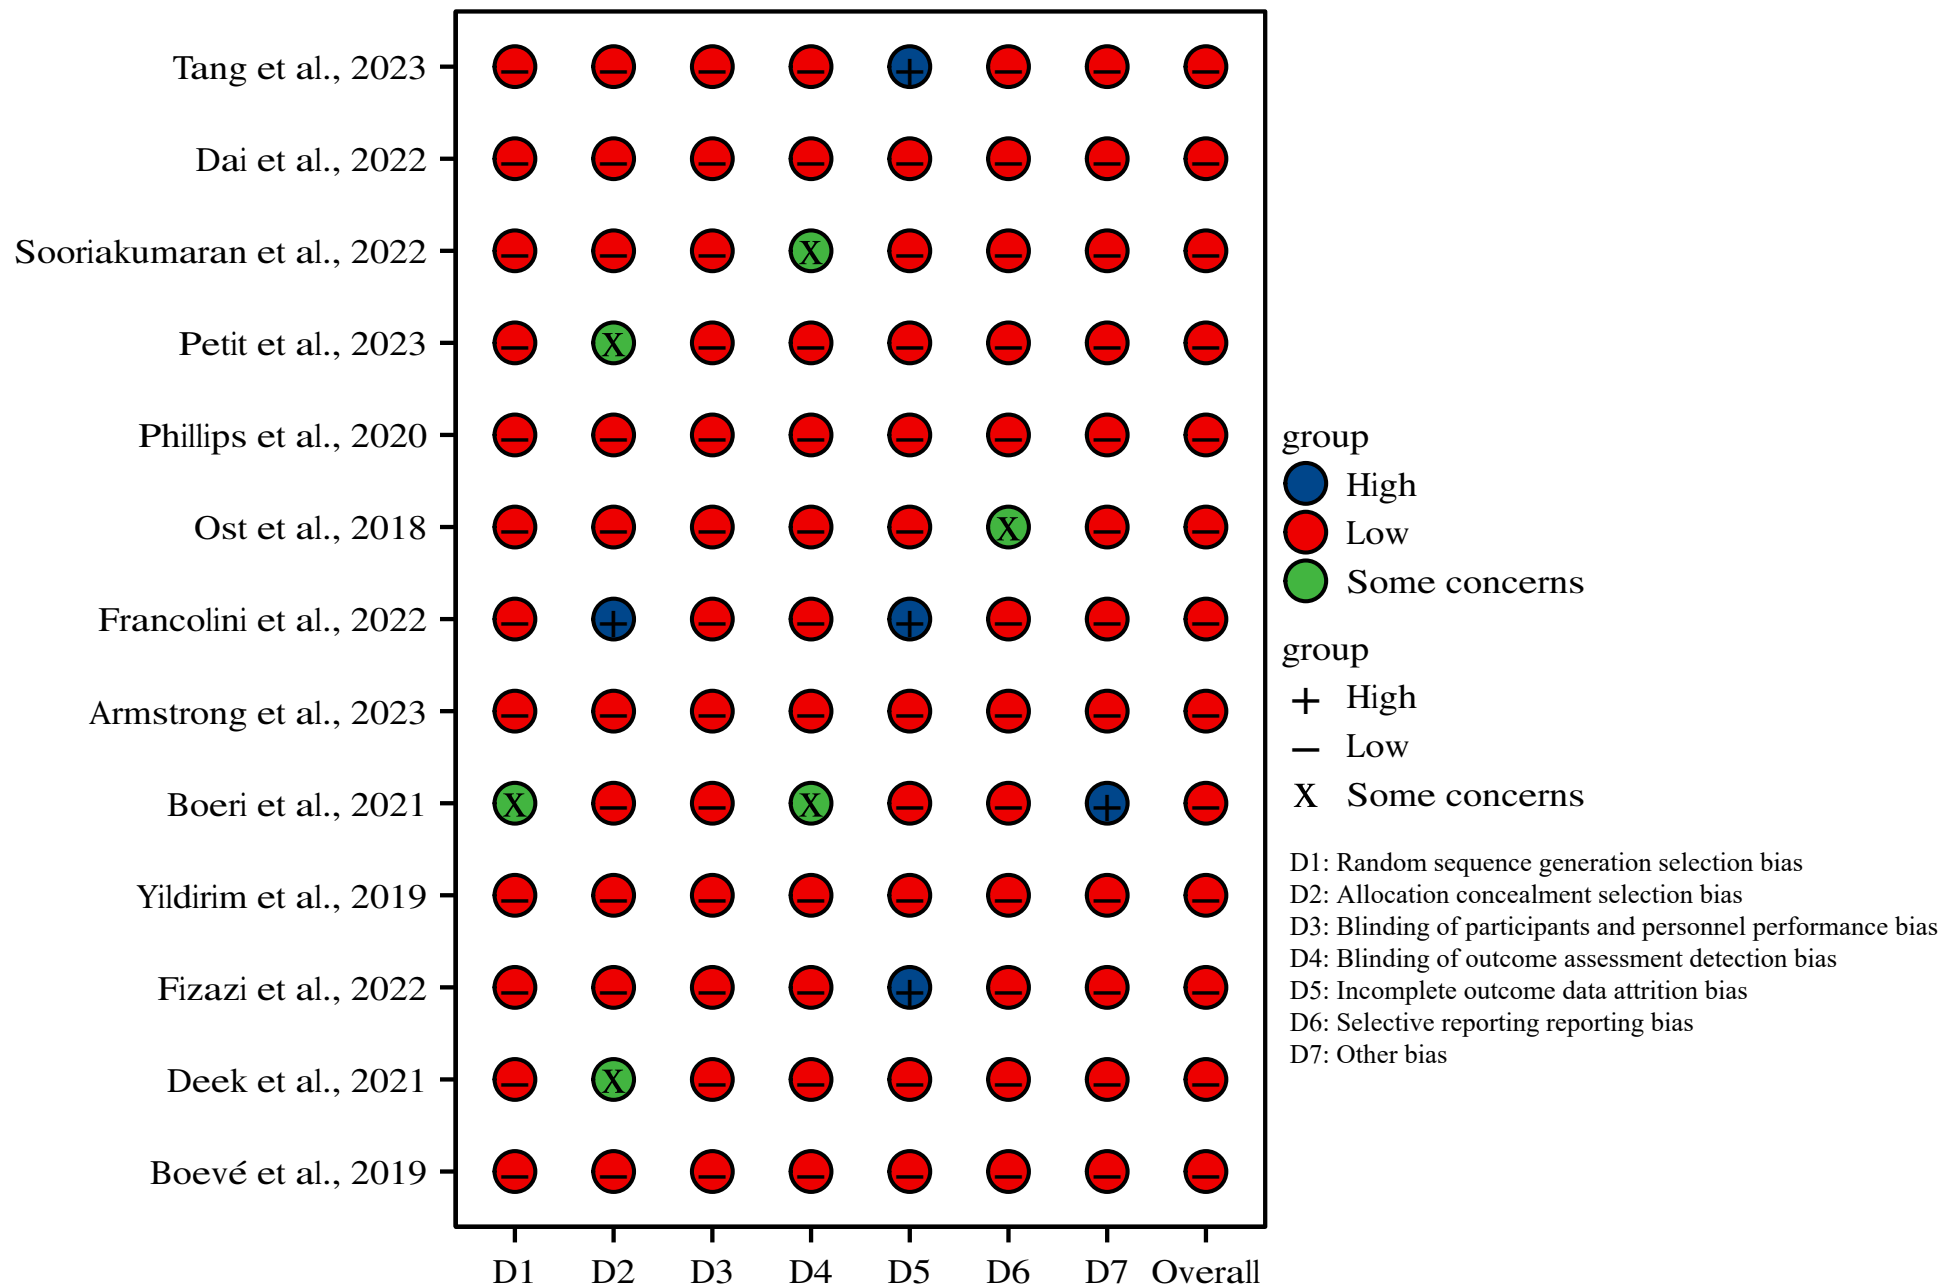

Supplement: SFigure3.pdf [file SFigure3.pdf]
